# Supplementary material
Source: PubMed Central journal article supplement (PMC3668497)
Supplement: Supp_Table1.pdf [file Supp_Table1.pdf]

## Supplementary Data

SUPPLEMENTARY TABLE S1. THE ASSOCIATIONS OF EACH OF THE SEVEN INVESTIGATED SNPs WITH EPIDURAL ROPIVACAINE CONSUMPTION DURING BREAST CANCER SURGERY IN WOMEN FROM NORTHEAST OF CHINA, HEILONGJIANG PROVINCE

| <i>SNP: rs3803662 near TNCR9</i>  |                       |              |              |              |              |                                    |                                  |
|-----------------------------------|-----------------------|--------------|--------------|--------------|--------------|------------------------------------|----------------------------------|
| <i>Genotype</i>                   |                       | GG           | GA           | AA           | GA+AA        | <i>p, three groups<sup>a</sup></i> | <i>p, two groups<sup>b</sup></i> |
| <i>n</i>                          |                       | 45           | 170          | 202          | 372          |                                    |                                  |
| Age, years                        | Mean                  | 46.7         | 49.5         | 49.8         | 49.7         | 0.175                              | 0.066                            |
|                                   | SD                    | 8.8          | 10.2         | 10.5         | 10.3         |                                    |                                  |
| Height, cm                        | Mean                  | 162.2        | 160.4        | 160.2        | 160.3        | 0.029                              | 0.008                            |
|                                   | SD                    | 4.1          | 4.0          | 5.0          | 4.6          |                                    |                                  |
| Weight, kg                        | Mean                  | 65.0         | 62.2         | 62.4         | 62.3         | 0.186                              | 0.069                            |
|                                   | SD                    | 11.2         | 9.0          | 9.6          | 9.3          |                                    |                                  |
| BMI, kg/m <sup>2</sup>            | Mean                  | 24.7         | 24.2         | 24.3         | 24.2         | 0.651                              | 0.401                            |
|                                   | SD                    | 3.8          | 3.2          | 3.5          | 3.4          |                                    |                                  |
| Initial lidocaine, mg             | Median                | 66.5         | 66.5         | 66.5         | 66.5         | 0.861                              | 0.693                            |
|                                   | [interquartile range] | [66.5,66.5]  | [66.5,66.5]  | [66.5,66.5]  | [66.5,66.5]  |                                    |                                  |
| Total ropivacaine, mg             | Median                | 58.8         | 53.2         | 53.6         | 53.4         | 0.220                              | 0.135                            |
|                                   | [interquartile range] | [42.4,86.0]  | [40.9,65.6]  | [41.4,70.0]  | [40.9,68.6]  |                                    |                                  |
| Onset of ropivacaine, min         | Median                | 6.0          | 6.0          | 6.0          | 6.0          | 0.619                              | 0.355                            |
|                                   | [interquartile range] | [5.0,7.5]    | [5.0,7.0]    | [5.0,7.0]    | [5.0,7.0]    |                                    |                                  |
| Duration of surgery, min          | Median                | 95.0         | 95.0         | 90.0         | 92.5         | 0.474                              | 0.412                            |
|                                   | [interquartile range] | [75.0,132.5] | [80.0,120.0] | [75.0,120.0] | [75.0,120.0] |                                    |                                  |
| Mean ropivacaine, mg/min          | Median                | 0.6          | 0.6          | 0.6          | 0.6          | 0.295                              | 0.349                            |
|                                   | [interquartile range] | [0.5,0.8]    | [0.4,0.7]    | [0.4,0.8]    | [0.4,0.8]    |                                    |                                  |
| <i>SNP: rs12443621 near TNCR9</i> |                       |              |              |              |              |                                    |                                  |
| <i>Genotype</i>                   |                       | GG           | GA           | AA           | GA+AA        | <i>p, three groups<sup>a</sup></i> | <i>p, two groups<sup>b</sup></i> |
| <i>n</i>                          |                       | 146          | 196          | 75           | 271          |                                    |                                  |
| Age, year                         | Mean                  | 49.8         | 49.4         | 48.3         | 49.1         | 0.564                              | 0.500                            |
|                                   | SD                    | 10.1         | 10.3         | 10.4         | 10.3         |                                    |                                  |
| Height, cm                        | Mean                  | 160.5        | 160.5        | 160.7        | 160.5        | 0.906                              | 0.906                            |
|                                   | SD                    | 4.7          | 4.6          | 4.2          | 4.5          |                                    |                                  |
| Weight, kg                        | Mean                  | 62.4         | 62.6         | 62.9         | 62.7         | 0.937                              | 0.809                            |
|                                   | SD                    | 10.4         | 8.6          | 10.3         | 9.1          |                                    |                                  |
| BMI, kg/m <sup>2</sup>            | Mean                  | 24.2         | 24.3         | 24.4         | 24.3         | 0.961                              | 0.797                            |
|                                   | SD                    | 3.7          | 3.0          | 3.7          | 3.2          |                                    |                                  |
| Initial lidocaine, mg             | Median                | 66.5         | 66.5         | 66.5         | 66.5         | 0.516                              | 0.339                            |
|                                   | [interquartile range] | [66.5,66.5]  | [66.5,66.5]  | [66.5,66.5]  | [66.5,66.5]  |                                    |                                  |
| Total ropivacaine, mg             | Median                | 55.5         | 53.1         | 53.4         | 53.2         | 0.602                              | 0.557                            |
|                                   | [interquartile range] | [41.7,71.9]  | [40.3,67.7]  | [44.2,71.6]  | [41.0,67.9]  |                                    |                                  |
| Onset of ropivacaine, min         | Median                | 6.0          | 6.0          | 6.0          | 6.0          | 0.239                              | 0.121                            |
|                                   | [interquartile range] | [5.0,7.0]    | [5.0,7.8]    | [5.0,7.0]    | [5.0,7.0]    |                                    |                                  |
| Duration of surgery, min          | Median                | 90.0         | 100.0        | 90.0         | 95.0         | 0.620                              | 0.768                            |
|                                   | [interquartile range] | [75.0,120.0] | [75.0,120.0] | [75.0,110.0] | [75.0,120.0] |                                    |                                  |
| Mean ropivacaine, mg/min          | Median                | 0.6          | 0.6          | 0.6          | 0.6          | 0.509                              | 0.610                            |
|                                   | [interquartile range] | [0.4,0.8]    | [0.4,0.7]    | [0.5,0.8]    | [0.4,0.8]    |                                    |                                  |

*(continued)*

SUPPLEMENTARY TABLE S1. (CONTINUED)

| <i>SNP: rs889312 in MAP3K1</i> |                       |              |              |              |              |                                    |                                  |
|--------------------------------|-----------------------|--------------|--------------|--------------|--------------|------------------------------------|----------------------------------|
| <i>Genotype</i>                |                       | <i>AA</i>    | <i>AC</i>    | <i>CC</i>    | <i>AC+CC</i> | <i>p, three groups<sup>a</sup></i> | <i>p, two groups<sup>b</sup></i> |
| <i>n</i>                       |                       | 112          | 191          | 114          | 305          |                                    |                                  |
| Age, year                      | Mean                  | 51.0         | 48.9         | 48.6         | 48.8         | 0.150                              | 0.052                            |
|                                | SD                    | 10.1         | 10.5         | 9.7          | 10.2         |                                    |                                  |
| Height, cm                     | Mean                  | 160.6        | 160.6        | 160.3        | 160.5        | 0.843                              | 0.902                            |
|                                | SD                    | 4.0          | 4.8          | 4.8          | 4.8          |                                    |                                  |
| Weight, kg                     | Mean                  | 62.4         | 62.9         | 62.3         | 62.7         | 0.813                              | 0.745                            |
|                                | SD                    | 9.1          | 9.5          | 10.2         | 9.7          |                                    |                                  |
| BMI, kg/m <sup>2</sup>         | Mean                  | 24.2         | 24.4         | 24.2         | 24.3         | 0.840                              | 0.686                            |
|                                | SD                    | 3.2          | 3.5          | 3.6          | 3.5          |                                    |                                  |
| Initial lidocaine, mg          | Median                | 66.5         | 66.5         | 66.5         | 66.5         | 0.896                              | 0.688                            |
|                                | [interquartile range] | [66.5,66.5]  | [66.5,66.5]  | [66.5,66.5]  | [66.5,66.5]  |                                    |                                  |
| Total ropivacaine, mg          | Median                | 53.3         | 53.6         | 54.8         | 53.6         | 0.470                              | 0.440                            |
|                                | [interquartile range] | [41.1,74.0]  | [39.8,68.3]  | [44.1,68.0]  | [41.2,68.0]  |                                    |                                  |
| Onset of ropivacaine, min      | Median                | 6.0          | 6.0          | 6.0          | 6.0          | 0.939                              | 0.743                            |
|                                | [interquartile range] | [5.0,8.0]    | [5.0,7.0]    | [5.0,7.0]    | [5.0,7.0]    |                                    |                                  |
| Duration of surgery, min       | Median                | 105.0        | 90.0         | 90.0         | 90.0         | 0.029                              | 0.008                            |
|                                | [interquartile range] | [81.3,120.0] | [75.0,120.0] | [75.0,120.0] | [75.0,120.0] |                                    |                                  |
| Mean ropivacaine, mg/min       | Median                | 0.6          | 0.6          | 0.6          | 0.6          | 0.594                              | 0.512                            |
|                                | [interquartile range] | [0.4,0.8]    | [0.4,0.8]    | [0.5,0.8]    | [0.4,0.8]    |                                    |                                  |
| <i>SNP: rs3817198 in LSP1</i>  |                       |              |              |              |              |                                    |                                  |
| <i>Genotype</i>                |                       | <i>TT</i>    | <i>TC</i>    | <i>CC</i>    | <i>TC+CC</i> | <i>p, three groups<sup>a</sup></i> | <i>p, two groups<sup>b</sup></i> |
| <i>n</i>                       |                       | 311          | 102          | 4            | 106          |                                    |                                  |
| Age, year                      | Mean                  | 49.3         | 49.5         | 51.3         | 49.5         | 0.924                              | 0.842                            |
|                                | SD                    | 10.2         | 10.3         | 8.8          | 10.2         |                                    |                                  |
| Height, cm                     | Mean                  | 160.5        | 160.7        | 161.3        | 160.7        | 0.876                              | 0.655                            |
|                                | SD                    | 4.6          | 4.6          | 2.5          | 4.6          |                                    |                                  |
| Weight, kg                     | Mean                  | 62.2         | 64.0         | 57.5         | 63.7         | 0.156                              | 0.163                            |
|                                | SD                    | 9.5          | 9.7          | 2.1          | 9.6          |                                    |                                  |
| BMI, kg/m <sup>2</sup>         | Mean                  | 24.2         | 24.8         | 22.1         | 24.7         | 0.140                              | 0.196                            |
|                                | SD                    | 3.4          | 3.4          | 1.1          | 3.4          |                                    |                                  |
| Initial lidocaine, mg          | Median                | 66.5         | 66.5         | 66.5         | 66.5         | 0.943                              | 0.939                            |
|                                | [interquartile range] | [66.5,66.5]  | [66.5,66.5]  | [56.5,66.5]  | [66.5,66.5]  |                                    |                                  |
| Total ropivacaine, mg          | Median                | 53.6         | 54.3         | 51.1         | 53.9         | 0.858                              | 0.585                            |
|                                | [interquartile range] | [41.4,70.1]  | [40.3,65.9]  | [47.7,65.2]  | [40.8,65.9]  |                                    |                                  |
| Onset of ropivacaine, min      | Median                | 6.0          | 6.0          | 5.0          | 6.0          | 0.180                              | 0.147                            |
|                                | [interquartile range] | [5.0,7.0]    | [5.0,7.0]    | [3.5,6.5]    | [5.0,7.0]    |                                    |                                  |
| Duration of surgery, min       | Median                | 95.0         | 90.0         | 70.0         | 90.0         | 0.338                              | 0.182                            |
|                                | [interquartile range] | [75.0,120.0] | [70.0,120.0] | [60.0,170.0] | [7.0,120.0]  |                                    |                                  |
| Mean ropivacaine, mg/min       | Median                | 0.6          | 0.6          | 0.7          | 0.6          | 0.838                              | 0.741                            |
|                                | [interquartile range] | [0.4,0.8]    | [0.5,0.8]    | [0.4,0.8]    | [0.5,0.8]    |                                    |                                  |
| <i>SNP: rs13387042 at 2q35</i> |                       |              |              |              |              |                                    |                                  |
| <i>Genotype</i>                |                       | <i>GG</i>    | <i>GA</i>    | <i>AA</i>    | <i>GA+AA</i> | <i>p, three groups<sup>a</sup></i> | <i>p, two groups<sup>b</sup></i> |
| <i>n</i>                       |                       | 319          | 95           | 3            | 98           |                                    |                                  |
| Age, year                      | Mean                  | 49.6         | 48.3         | 54.0         | 48.5         | 0.386                              | 0.320                            |
|                                | SD                    | 10.4         | 9.6          | 8.7          | 9.5          |                                    |                                  |
| Height, cm                     | Mean                  | 160.3        | 161.5        | 153.3        | 161.3        | 0.002                              | 0.063                            |
|                                | SD                    | 4.3          | 5.3          | 2.3          | 5.4          |                                    |                                  |
| Weight, kg                     | Mean                  | 62.7         | 62.3         | 56.7         | 62.1         | 0.517                              | 0.580                            |
|                                | SD                    | 9.3          | 10.2         | 13.6         | 10.3         |                                    |                                  |
| BMI, kg/m <sup>2</sup>         | Mean                  | 24.4         | 23.9         | 24.0         | 23.9         | 0.412                              | 0.183                            |

(continued)

SUPPLEMENTARY TABLE S1. (CONTINUED)

| SNP: rs13387042 at 2q35   |                       |              |              |               |              |                              |                            |
|---------------------------|-----------------------|--------------|--------------|---------------|--------------|------------------------------|----------------------------|
| Genotype                  |                       | GG           | GA           | AA            | GA+AA        | p, three groups <sup>a</sup> | p, two groups <sup>b</sup> |
| Initial lidocaine, mg     | SD                    | 3.3          | 3.6          | 5.0           | 3.7          | 0.688                        | 0.512                      |
|                           | Median                | 66.5         | 66.5         | 66.5          | 66.5         |                              |                            |
| Total ropivacaine, mg     | [interquartile range] | [66.5,66.5]  | [66.5,66.5]  | [53.2,66.5]   | [66.5,66.5]  | 0.282                        | 0.279                      |
|                           | Median                | 53.6         | 53.6         | 61.8          | 53.7         |                              |                            |
| Onset of ropivacaine, min | [interquartile range] | [41.8,69.9]  | [37.5,68.8]  | [49.6,101.1]  | [37.7,68.9]  | 0.544                        | 0.505                      |
|                           | Median                | 6.0          | 6.0          | 5.0           | 6.0          |                              |                            |
| Duration of surgery, min  | [interquartile range] | [5.0,7.0]    | [5.0,7.0]    | [5.0,6.0]     | [5.0,7.0]    | 0.162                        | 0.243                      |
|                           | Median                | 95.0         | 90.0         | 120.0         | 90.0         |                              |                            |
| Mean ropivacaine, mg/min  | [interquartile range] | [75.0,120.0] | [70.0,115.0] | [100.0,130.0] | [73.8,120.0] | 0.906                        | 0.686                      |
|                           | Median                | 0.6          | 0.6          | 0.6           | 0.6          |                              |                            |
| [interquartile range]     | [0.4,0.8]             | [0.4,0.8]    | [0.4,0.8]    | [0.4,0.8]     |              |                              |                            |
| SNP: rs13281615 at 8q24   |                       |              |              |               |              |                              |                            |
| Genotype                  |                       | AA           | AG           | GG            | AG+GG        | p, three groups <sup>a</sup> | p, two groups <sup>b</sup> |
| <i>n</i>                  |                       | 100          | 215          | 102           | 317          |                              |                            |
| Age, year                 | Mean                  | 49.1         | 49.0         | 50.3          | 49.4         | 0.526                        | 0.764                      |
|                           | SD                    | 10.9         | 9.7          | 10.6          | 10.0         |                              |                            |
| Height, cm                | Mean                  | 160.7        | 160.1        | 161.3         | 160.5        | 0.070                        | 0.666                      |
|                           | SD                    | 4.6          | 4.5          | 4.6           | 4.6          |                              |                            |
| Weight, kg                | Mean                  | 62.2         | 61.9         | 64.5          | 62.7         | 0.060                        | 0.590                      |
|                           | SD                    | 9.7          | 9.0          | 10.3          | 9.5          |                              |                            |
| BMI, kg/m <sup>2</sup>    | Mean                  | 24.0         | 24.2         | 24.8          | 24.4         | 0.253                        | 0.418                      |
|                           | SD                    | 3.4          | 3.4          | 3.4           | 3.4          |                              |                            |
| Initial lidocaine, mg     | Median                | 66.5         | 66.5         | 66.5          | 66.5         | 0.806                        | 0.584                      |
|                           | [interquartile range] | [66.5,66.5]  | [66.5,66.5]  | [66.5,66.5]   | [66.5,66.5]  |                              |                            |
| Total ropivacaine, mg     | Median                | 50.8         | 52.6         | 61.4          | 54.5         | 0.001                        | 0.047                      |
|                           | [interquartile range] | [38.1,67.9]  | [40.6,67.8]  | [50.0,75.7]   | [42.0,71.5]  |                              |                            |
| Onset of ropivacaine, min | Median                | 6.0          | 6.0          | 6.0           | 6.0          | 0.103                        | 0.055                      |
|                           | [interquartile range] | [5.0,7.0]    | [5.0,7.0]    | [5.0,8.0]     | [5.0,7.0]    |                              |                            |
| Duration of surgery, min  | Median                | 100.0        | 90.0         | 105.0         | 90.0         | 0.163                        | 0.573                      |
|                           | [interquartile range] | [75.0,120.0] | [75.0,120.0] | [80.0,120.0]  | [75.0,120.0] |                              |                            |
| Mean ropivacaine, mg/min  | Median                | 0.5          | 0.6          | 0.6           | 0.6          | 0.003                        | 0.003                      |
|                           | [interquartile range] | [0.4,0.7]    | [0.4,0.8]    | [0.5,0.8]     | [0.5,0.8]    |                              |                            |
| SNP: rs2046210 at 6q25    |                       |              |              |               |              |                              |                            |
| Genotype                  |                       | GG           | GA           | AA            | GA+AA        | p, three groups <sup>a</sup> | p, two groups <sup>b</sup> |
| <i>n</i>                  |                       | 139          | 203          | 75            | 278          |                              |                            |
| Age, year                 | Mean                  | 49.4         | 49.3         | 49.5          | 49.3         | 0.984                        | 0.914                      |
|                           | SD                    | 9.3          | 10.6         | 10.9          | 10.6         |                              |                            |
| Height, cm                | Mean                  | 160.8        | 160.5        | 160.1         | 160.4        | 0.620                        | 0.434                      |
|                           | SD                    | 4.2          | 4.8          | 4.5           | 4.7          |                              |                            |
| Weight, kg                | Mean                  | 62.9         | 62.4         | 62.7          | 62.5         | 0.888                        | 0.690                      |
|                           | SD                    | 10.4         | 9.4          | 8.5           | 9.1          |                              |                            |
| BMI, kg/m <sup>2</sup>    | Mean                  | 24.3         | 24.2         | 24.5          | 24.3         | 0.830                        | 0.926                      |
|                           | SD                    | 3.7          | 3.3          | 3.2           | 3.3          |                              |                            |
| Initial lidocaine, mg     | Median                | 66.50        | 66.5         | 66.5          | 66.5         | 0.253                        | 0.098                      |
|                           | [interquartile range] | [66.5,66.5]  | [66.5,66.5]  | [66.5,66.5]   | [66.5,66.5]  |                              |                            |
| Total ropivacaine, mg     | Median                | 55.4         | 52.0         | 56.3          | 52.8         | 0.053                        | 0.359                      |
|                           | [interquartile range] | [42.5,68.8]  | [39.8,66.7]  | [46.7,76.5]   | [40.9,69.3]  |                              |                            |
| Onset of ropivacaine, min | Median                | 6.0          | 6.0          | 6.0           | 6.0          | 0.730                        | 0.429                      |
|                           | [interquartile range] | [5.0,7.0]    | [5.0,7.0]    | [5.0,8.0]     | [5.0,7.0]    |                              |                            |
| Duration of surgery, min  | Median                | 95.0         | 90.0         | 100.0         | 95.0         | 0.352                        | 0.616                      |
|                           | [interquartile range] | [75.0,120.0] | [75.0,120.0] | [85.0,120.0]  | [75.0,120.0] |                              |                            |
| Mean ropivacaine, mg/min  | Median                | 0.6          | 0.6          | 0.6           | 0.6          | 0.548                        | 0.698                      |
|                           | [interquartile range] | [0.4,0.8]    | [0.4,0.7]    | [0.4,0.8]     | [0.4,0.8]    |                              |                            |

<sup>a</sup>Comparing the three genotype groups separately.

<sup>b</sup>A dominant model, comparing the group of homozygous patients for the nonrisk allele with the combined group of heterozygous patients and patients homozygous for the risk allele.

BMI, body mass index.
